# Supplementary material for: Bilingual Language Experience Shapes Resting-State Brain Rhythms
Source: PubMed Central journal article supplement (PMC10158654; doi:10.1162/nol_a_00014), 2020-07-01
Supplement: nol-1-3-288-s001.pdf [file nol-1-3-288-s001.pdf]

Full set of correlational results for each linguistic or cognitive variable included, using permuted Spearman's rho. Values in the tables are the rho values for the relation between the individual's score on the variable and their average power for the indicated electrode region and frequency range; italicized values were marginally significant, bolded values indicate significant relations

L1 Proficiency

Collapsed Across Groups

|                       | Theta       | Alpha | Low Beta    | High Beta | Gamma |
|-----------------------|-------------|-------|-------------|-----------|-------|
| Left Fronto-Temporal  | <b>0.20</b> | 0.07  | <b>0.18</b> | 0.09      | 0.01  |
| Medial Frontal        | 0.12        | -0.04 | 0.10        | 0.02      | 0.03  |
| Right Fronto-Temporal | 0.06        | 0.00  | 0.09        | 0.06      | -0.08 |
| Left Posterior        | 0.06        | -0.09 | 0.05        | -0.03     | 0.05  |
| Right Posterior       | 0.07        | -0.11 | 0.04        | -0.09     | -0.01 |

L1 Proficiency

Bilinguals Only

|                       | Theta       | Alpha       | Low Beta    | High Beta | Gamma |
|-----------------------|-------------|-------------|-------------|-----------|-------|
| Left Fronto-Temporal  | <i>0.18</i> | <b>0.19</b> | <b>0.20</b> | 0.05      | 0.04  |
| Medial Frontal        | 0.13        | 0.10        | 0.13        | 0.05      | 0.11  |
| Right Fronto-Temporal | 0.11        | <i>0.18</i> | <i>0.18</i> | 0.11      | -0.04 |
| Left Posterior        | 0.06        | 0.01        | 0.09        | 0.01      | 0.11  |
| Right Posterior       | 0.11        | 0.03        | 0.12        | 0.02      | 0.09  |

L1 Proficiency

Monolinguals Only

|                       | Theta | Alpha | Low Beta | High Beta | Gamma |
|-----------------------|-------|-------|----------|-----------|-------|
| Left Fronto-Temporal  | 0.04  | -0.08 | -0.01    | -0.04     | -0.05 |
| Medial Frontal        | -0.05 | -0.13 | 0.01     | -0.09     | 0.03  |
| Right Fronto-Temporal | -0.09 | -0.15 | -0.03    | -0.04     | -0.08 |
| Left Posterior        | 0.01  | -0.14 | -0.04    | -0.08     | 0.11  |
| Right Posterior       | -0.04 | -0.13 | -0.03    | -0.11     | -0.07 |

L1 Current Usage

Bilinguals Only

|                       | Theta        | Alpha        | Low Beta | High Beta | Gamma |
|-----------------------|--------------|--------------|----------|-----------|-------|
| Left Fronto-Temporal  | -0.07        | -0.13        | -0.01    | -0.04     | -0.03 |
| Medial Frontal        | -0.09        | <i>-0.18</i> | -0.10    | -0.09     | -0.08 |
| Right Fronto-Temporal | -0.04        | -0.08        | -0.01    | 0.00      | -0.05 |
| Left Posterior        | <i>-0.17</i> | <b>-0.24</b> | -0.11    | -0.12     | -0.07 |
| Right Posterior       | -0.05        | <i>-0.18</i> | -0.07    | -0.05     | -0.01 |

L2 Proficiency

Collapsed Across Groups

|                      | Theta | Alpha | Low Beta | High Beta | Gamma |
|----------------------|-------|-------|----------|-----------|-------|
| Left Fronto-Temporal | -0.11 | 0.03  | -0.10    | -0.08     | -0.03 |

|                       |       |      |       |       |      |
|-----------------------|-------|------|-------|-------|------|
| Medial Frontal        | -0.05 | 0.08 | -0.06 | -0.09 | 0.04 |
| Right Fronto-Temporal | -0.05 | 0.04 | -0.06 | -0.04 | 0.11 |
| Left Posterior        | 0.03  | 0.13 | -0.04 | 0.00  | 0.09 |
| Right Posterior       | 0.01  | 0.17 | -0.03 | -0.04 | 0.01 |

L2 Proficiency  
Bilinguals Only

|                       | Theta | Alpha | Low Beta | High Beta | Gamma |
|-----------------------|-------|-------|----------|-----------|-------|
| Left Fronto-Temporal  | 0.01  | 0.04  | -0.04    | -0.06     | -0.09 |
| Medial Frontal        | 0.04  | 0.05  | -0.01    | -0.11     | -0.08 |
| Right Fronto-Temporal | 0.04  | 0.01  | -0.03    | -0.07     | 0.01  |
| Left Posterior        | 0.07  | 0.13  | 0.00     | -0.03     | 0.00  |
| Right Posterior       | 0.04  | 0.13  | -0.03    | -0.11     | -0.08 |

L2 Age of Acquisition  
Collapsed Across Groups

|                       | Theta | Alpha | Low Beta | High Beta | Gamma |
|-----------------------|-------|-------|----------|-----------|-------|
| Left Fronto-Temporal  | 0.14  | -0.11 | -0.01    | -0.02     | 0.02  |
| Medial Frontal        | -0.03 | -0.17 | -0.08    | -0.07     | -0.04 |
| Right Fronto-Temporal | 0.06  | -0.14 | -0.04    | -0.05     | -0.02 |
| Left Posterior        | 0.04  | -0.07 | 0.06     | 0.03      | -0.04 |
| Right Posterior       | -0.09 | -0.20 | -0.07    | -0.06     | 0.02  |

L2 Age of Acquisition  
Bilinguals Only

|                       | Theta | Alpha | Low Beta | High Beta | Gamma |
|-----------------------|-------|-------|----------|-----------|-------|
| Left Fronto-Temporal  | 0.04  | -0.13 | -0.08    | -0.04     | 0.07  |
| Medial Frontal        | -0.14 | -0.17 | -0.15    | -0.09     | 0.04  |
| Right Fronto-Temporal | -0.01 | -0.13 | -0.08    | -0.05     | 0.07  |
| Left Posterior        | 0.02  | -0.06 | 0.04     | 0.06      | 0.04  |
| Right Posterior       | -0.14 | -0.17 | -0.08    | -0.02     | 0.09  |

Simon Effect- Inverse Efficiency Score  
Collapsed Across Groups

|                       | Theta | Alpha | Low Beta | High Beta | Gamma |
|-----------------------|-------|-------|----------|-----------|-------|
| Left Fronto-Temporal  | -0.04 | -0.12 | -0.06    | -0.01     | 0.01  |
| Medial Frontal        | -0.02 | -0.12 | -0.06    | -0.05     | -0.07 |
| Right Fronto-Temporal | 0.01  | -0.10 | -0.06    | -0.06     | 0.02  |
| Left Posterior        | -0.11 | -0.13 | -0.10    | -0.01     | 0.02  |
| Right Posterior       | -0.02 | -0.10 | -0.08    | 0.00      | -0.04 |

Simon Effect- Inverse Efficiency Score  
Bilinguals Only

|                       | Theta | Alpha | Low Beta | High Beta | Gamma |
|-----------------------|-------|-------|----------|-----------|-------|
| Left Fronto-Temporal  | -0.09 | 0.00  | -0.07    | 0.01      | 0.13  |
| Medial Frontal        | -0.04 | 0.03  | -0.06    | -0.03     | 0.02  |
| Right Fronto-Temporal | 0.04  | 0.08  | -0.05    | 0.00      | 0.13  |

|                 |       |       |       |       |      |
|-----------------|-------|-------|-------|-------|------|
| Left Posterior  | -0.17 | -0.05 | -0.12 | -0.02 | 0.04 |
| Right Posterior | 0.04  | 0.08  | -0.05 | 0.00  | 0.13 |

Simon Effect- Inverse Efficiency Score

Monolinguals Only

|                       | Theta | Alpha        | Low Beta | High Beta | Gamma |
|-----------------------|-------|--------------|----------|-----------|-------|
| Left Fronto-Temporal  | -0.12 | <b>-0.25</b> | -0.14    | -0.11     | -0.13 |
| Medial Frontal        | -0.10 | <b>-0.22</b> | -0.09    | -0.09     | -0.11 |
| Right Fronto-Temporal | -0.08 | <i>-0.19</i> | -0.06    | -0.09     | -0.02 |
| Left Posterior        | -0.10 | -0.18        | -0.13    | 0.04      | 0.08  |
| Right Posterior       | -0.08 | -0.10        | -0.09    | 0.03      | 0.02  |
