# Supplementary material for: Bilingual Language Experience Shapes Resting-State Brain Rhythms
Source: PubMed Central journal article supplement (PMC10158654; doi:10.1162/nol_a_00014), 2020-07-01
Supplement: nol-1-3-288-s002.pdf [file nol-1-3-288-s002.pdf]

Group differences in power (bilinguals - monolinguals) for each electrode region and frequency range. Values are the mean difference; italicized values are marginally significant after FDR-correction of the permuted t-tests, bold values indicate significant group difference after FDR-correction

|                       | Theta        | Alpha       | Low Beta | High Beta   | Gamma |
|-----------------------|--------------|-------------|----------|-------------|-------|
| Left Fronto-Temporal  | <b>-0.20</b> | 0.07        | -0.05    | -0.03       | 0.03  |
| Medial-Frontal        | -0.11        | <i>0.23</i> | 0.02     | 0.07        | 0.10  |
| Right Fronto-Temporal | -0.07        | 0.17        | 0.02     | 0.04        | 0.12  |
| Left Posterior        | -0.08        | 0.22        | 0.01     | 0.07        | 0.09  |
| Right Posterior       | -0.07        | <b>0.31</b> | 0.06     | <b>0.16</b> | 0.17  |

Group differences in coherence (bilinguals - monolinguals) for every connection between electrode regions and for each frequency range. Values are the mean difference; italicized values are marginally significant after FDR-correction of the permuted t-tests, bold values indicate significant group difference after FDR-correction

Connection between:

| Electrode Region 1:   | Electrode Region 2:   | Theta         | Alpha        | Low Beta     | High Beta    | Gamma        |
|-----------------------|-----------------------|---------------|--------------|--------------|--------------|--------------|
| Left Fronto-Temporal  | Medial Frontal        | 0.005         | 0.008        | 0.004        | 0.006        | 0.006        |
| Left Fronto-Temporal  | Right Fronto-Temporal | -0.002        | -0.007       | 0.000        | 0.006        | 0.007        |
| Left Fronto-Temporal  | Left Fronto-Temporal  | 0.008         | 0.002        | 0.002        | 0.005        | 0.005        |
| Left Posterior        | Left Fronto-Temporal  | 0.011         | <b>0.021</b> | <b>0.014</b> | <b>0.013</b> | 0.009        |
| Left Posterior        | Medial Frontal        | 0.005         | <b>0.020</b> | 0.009        | 0.007        | 0.004        |
| Left Posterior        | Right Fronto-Temporal | 0.007         | <i>0.012</i> | <i>0.011</i> | 0.008        | 0.007        |
| Left Posterior        | Right Posterior       | 0.009         | <b>0.021</b> | <i>0.012</i> | 0.010        | 0.009        |
| Left Posterior        | Left Posterior        | 0.008         | <b>0.024</b> | <i>0.011</i> | 0.010        | 0.007        |
| Medial Frontal        | Medial Frontal        | <i>-0.018</i> | -0.010       | -0.014       | -0.005       | 0.001        |
| Right Fronto-Temporal | Medial Frontal        | 0.002         | -0.010       | 0.003        | 0.006        | 0.007        |
| Right Fronto-Temporal | Right Fronto-Temporal | -0.007        | -0.012       | -0.002       | 0.005        | 0.007        |
| Right Posterior       | Left Fronto-Temporal  | 0.009         | <b>0.011</b> | <i>0.009</i> | <i>0.010</i> | <i>0.010</i> |
| Right Posterior       | Medial Frontal        | 0.013         | <i>0.012</i> | <b>0.017</b> | <i>0.013</i> | 0.011        |
| Right Posterior       | Right Fronto-Temporal | 0.006         | 0.009        | <b>0.016</b> | <i>0.014</i> | <i>0.013</i> |
| Right Posterior       | Right Posterior       | 0.005         | <b>0.013</b> | 0.008        | 0.010        | <i>0.011</i> |
